# Supplementary material
Source: PubMed Central journal article supplement (PMC7220178)
Supplement: mmc1.pdf [file mmc1.pdf]

# THE LANCET

## Planetary Health

### Supplementary appendix

This appendix formed part of the original submission and has been peer reviewed.  
We post it as supplied by the authors.

Supplement to: Chen K, Wang M, Huang C, Kinney PL, Anastas PT. Air pollution reduction and mortality benefit during the COVID-19 outbreak in China. *Lancet Planet Health* 2020; published online May 13. [https://doi.org/10.1016/S2542-5196\(20\)30107-8](https://doi.org/10.1016/S2542-5196(20)30107-8).

## Supplementary Material

### Air Pollution Reduction and Mortality Benefit during the COVID-19 Outbreak in China

#### Table of Contents

**Table S1.** Cause-specific coefficients ( $\beta$ ) and 95% confidence intervals of the concentration-response functions for daily PM<sub>2.5</sub> and NO<sub>2</sub> applied in this study.

**Table S2.** Air pollution changes due to the quarantine in Wuhan, Hubei, and China.

**Table S3.** Avoided cause-specific deaths (95% confidence interval) due to air pollution reduction due to the quarantine.

**Table S1. Cause-specific coefficients ( $\beta$ ) and 95% confidence intervals of the concentration-response functions for daily PM<sub>2.5</sub> and NO<sub>2</sub> applied in this study. <sup>a</sup>**

| Cause of deaths        | NO <sub>2</sub> | PM <sub>2.5</sub> |
|------------------------|-----------------|-------------------|
| Total                  | 0.9 (0.7, 1.1)  | 0.22 (0.15, 0.28) |
| Cardiovascular disease | 0.9 (0.7, 1.2)  | 0.27 (0.18, 0.36) |
| Hypertensive disease   | 1.4 (0.8, 2.0)  | 0.39 (0.13, 0.65) |
| Coronary heart disease | 0.9 (0.6, 1.2)  | 0.30 (0.19, 0.40) |
| Stroke                 | 0.9 (0.5, 1.2)  | 0.23 (0.13, 0.34) |
| Respiratory disease    | 1.2 (0.9, 1.5)  | 0.29 (0.17, 0.42) |
| COPD <sup>b</sup>      | 1.6 (1.1, 2.0)  | 0.38 (0.23, 0.53) |

<sup>a</sup>  $\beta$  is expressed as the percentage change in daily mortality associated with a 10  $\mu\text{g}/\text{m}^3$  increase in daily NO<sub>2</sub> or PM<sub>2.5</sub> concentrations, which is obtained from a previous study of 272 Chinese cities. NO<sub>2</sub> estimates were from Chen R, Yin P, Meng X, et al. Associations between ambient nitrogen dioxide and daily cause-specific mortality: evidence from 272 Chinese cities. *Epidemiology* 2018; 29(4): 482-9. PM<sub>2.5</sub> estimates were from Chen R, Yin P, Meng X, et al. Fine particulate air pollution and daily mortality. A nationwide analysis in 272 Chinese cities. *Am J Respir Crit Care Med* 2017; 196(1): 73-81.

<sup>b</sup> COPD represents chronic obstructive pulmonary disease.

**Table S2. Air pollution changes due to the quarantine in Wuhan, Hubei, and China.**

|                                            | Main analysis defining before quarantine period as<br>5 to 20 days before the Chinese Lunar New Year |                                  |                             | Using alternative before quarantine period as<br>5 to 24 days before the Chinese Lunar New Year |                                  |                             |
|--------------------------------------------|------------------------------------------------------------------------------------------------------|----------------------------------|-----------------------------|-------------------------------------------------------------------------------------------------|----------------------------------|-----------------------------|
|                                            | During vs before<br>in 2020                                                                          | During vs before<br>in 2016-2019 | Difference in<br>difference | During vs before<br>in 2020                                                                     | During vs before<br>in 2016-2019 | Difference in<br>difference |
| <i>NO<sub>2</sub> (µg/m<sup>3</sup>)</i>   |                                                                                                      |                                  |                             |                                                                                                 |                                  |                             |
| Wuhan                                      | -21.7                                                                                                | 1.1                              | -22.8                       | -23.8                                                                                           | 2.5                              | -26.3                       |
| Hubei (Outside Wuhan)                      | -16.9                                                                                                | -4.7                             | -12.2                       | -16.9                                                                                           | -4.7                             | -12.2                       |
| China (Outside Hubei)                      | -15.6                                                                                                | -2.7                             | -12.9                       | -17.5                                                                                           | -3.4                             | -14.2                       |
| China                                      | -15.7                                                                                                | -2.7                             | -12.9                       | -17.5                                                                                           | -3.4                             | -14.2                       |
| <i>PM<sub>2.5</sub> (µg/m<sup>3</sup>)</i> |                                                                                                      |                                  |                             |                                                                                                 |                                  |                             |
| Wuhan                                      | -20.0                                                                                                | -18.6                            | -1.4                        | -25.4                                                                                           | -20.8                            | -4.7                        |
| Hubei (Outside Wuhan)                      | -18.5                                                                                                | -22.2                            | 3.7                         | -18.5                                                                                           | -22.2                            | 3.7                         |
| China (Outside Hubei)                      | -26.3                                                                                                | -6.6                             | -19.7                       | -27.8                                                                                           | -9.6                             | -18.2                       |
| China                                      | -26.0                                                                                                | -7.1                             | -18.9                       | -27.8                                                                                           | -9.6                             | -18.2                       |

Note: During quarantine was defined as the period from 17 to 50 days after the Chinese Lunar New Year.

**Table S3. Avoided cause-specific deaths (95% confidence interval) due to air pollution reduction due to the quarantine.**

|                        | Main analysis defining before quarantine period as<br>5 to 20 days before the Chinese Lunar New Year |                   | Using alternative before quarantine period as<br>5 to 24 days before the Chinese Lunar New Year |                   |
|------------------------|------------------------------------------------------------------------------------------------------|-------------------|-------------------------------------------------------------------------------------------------|-------------------|
|                        | NO <sub>2</sub>                                                                                      | PM <sub>2.5</sub> | NO <sub>2</sub>                                                                                 | PM <sub>2.5</sub> |
| Total                  | 8911 (6950, 10866)                                                                                   | 3214 (2340, 4087) | 9803 (7647, 11953)                                                                              | 3095 (2253, 3936) |
| Hypertensive disease   | 490 (283, 695)                                                                                       | 202 (68, 335)     | 539 (311, 764)                                                                                  | 194 (65, 323)     |
| Coronary heart disease | 1757 (1177, 2335)                                                                                    | 863 (577, 1150)   | 1933 (1296, 2569)                                                                               | 831 (555, 1107)   |
| Stroke                 | 2074 (1390, 2756)                                                                                    | 782 (409, 1154)   | 2282 (1529, 3032)                                                                               | 753 (394, 1112)   |
| COPD                   | 1427 (1076, 1776)                                                                                    | 503 (305, 700)    | 1569 (1184, 1952)                                                                               | 484 (294, 674)    |

Note: During quarantine was defined as the period from 17 to 50 days after the Chinese Lunar New Year.
